# Supplementary material for: Predicting the potential distribution of the endemic seabird Pelecanus thagus in the Humboldt Current Large Marine Ecosystem under different climate change scenarios
Source: PeerJ. 2019 Oct 25;7:e7642. doi: 10.7717/peerj.7642 (PMC6816470; doi:10.7717/peerj.7642)
Supplement: Supplemental Information 1 — Georeferenced data points referring to pelican sightings (in resting place, nesting sites, coves, beaches, etc.), encompassing its entire geographic distribution from 2000 to 2015. [file peerj-07-7642-s001.csv]

long	lat
-71.7111969	-33.7523188
-70.4266655	-23.5061421
-71.4966631	-31.8780678
-71.6313267	-33.6204594
-73.8277817	-41.8675155
-71.5079069	-32.9166655
-70.4522431	-23.7513448
-78.43099	-9.351613
-73.7263298	-45.3744582
-71.3369751	-29.8858996
-72.0247364	-34.3911166
-73.407383	-39.8859825
-73.9995852	-41.8454962
-70.2929306	-22.8651879
-71.4956117	-29.0791377
-71.68708	-39.01632
-72.6288	-32.9819
-71.5288281	-32.2367985
-71.6623417	-31.145656
-71.4971137	-30.2497018
-71.4491343	-32.506215
-73.4363937	-38.7467871
-70.6530762	-26.0592503
-73.4858608	-41.8108418
-73.1983316	-39.4379579
-72.6299286	-35.8434213
-73.5945743	-41.6158193
-70.434106	-25.2440325
-71.2038517	-28.4375251
-71.6657925	-33.0985164
-81.351275	-4.73235
-73.8687569	-46.6486944
-73.5251427	-45.1607374
-73.6592102	-41.8480817
-72.535708	-42.5588653
-71.6879797	-33.3598538
-72.9007137	-41.4878855
-72.0461082	-34.6401286
-70.304081	-18.5382168
-73.6402416	-42.5354543
-71.3056111	-29.4509754
-73.2249069	-39.3074721
-71.8418768	-33.9237409
-73.510472	-37.044344
-73.5994877	-39.957943
-72.434535	-35.3310155
-71.7731167	-32.7892417
-70.4836464	-23.0989968
-72.5456915	-33.1120649
-73.2654619	-39.8246221
-72.953768	-43.776188
-71.4432335	-32.6532302
-72.8627443	-36.3872129
-71.5592766	-31.6204244
-71.2877879	-29.611333
-73.1546974	-36.8977436
-70.151841	-20.2100421
-70.6333566	-26.3519403
-70.447411	-18.48464
-73.2120538	-36.7736026
-78.615853	-9.023806
-70.2589738	-22.4452161
-72.9890013	-36.7225122
-70.6078005	-23.4755046
-73.1149578	-45.3365209
-73.1359863	-41.7729845
-72.8142661	-36.0936522
-76.184109	-13.635266
-72.6501846	-41.6723989
-72.384137	-44.24535
-72.1866989	-34.9498461
-71.9401932	-34.0693337
-73.887085	-42.178874
-71.4837456	-29.2091888
-72.2467804	-35.1553896
-71.5202427	-32.7592257
-73.3502626	-39.6707278
-70.8699009	-27.1310689
-73.1680879	-37.093608
-71.7710638	-33.5576062
-70.468117	-25.009705
-70.2732754	-19.1863534
-71.6920996	-30.4725706
-71.5062	-29.8715
-70.606549	-18.215871
-71.8493838	-29.7415803
-73.2687879	-42.3132111
-72.0419025	-34.7716527
-73.4812617	-42.164485
-79.223957	-7.976688
-70.65032	-22.88385
-72.6158953	-35.6373833
-70.1743126	-20.3929053
-73.8972	-44.4394
-70.9291506	-27.3371193
-70.6469237	-26.1980001
-73.9097	-38.4446
-73.8562775	-43.9183068
-74.002533	-42.0441936
-73.7210083	-40.5631295
-71.644249	-33.4901577
-80.835208	-6.269503
-72.4356079	-42.4153461
-80.981528	-2.090135
-73.5611916	-42.7561194
-72.9780579	-36.5570847
-70.1844406	-20.8242393
-70.3343868	-18.7521791
-73.5083628	-38.5313818
-70.0579584	-21.4298505
-71.204342	-17.763755
-74.1208076	-42.5950491
-70.540457	-24.346864
-72.761755	-41.5266605
-76.357537	-13.729023
-70.4166667	-22.7
-72.9711	-43.6155
-75.5763245	-44.8870125
-70.7904053	-25.2112365
-72.5097656	-42.2224158
-71.68728	-30.88214
-73.0894661	-44.0855505
-71.3764143	-30.0695025
-70.0828171	-21.252582
-70.4815865	-25.4009902
-73.3135271	-37.2404419
-80.906809	-5.814281
-80.59943	-6.402227
-71.5661806	-30.4053561
-71.1639404	-28.1667565
-71.6954041	-30.7277447
-70.1790825	-20.5345763
-73.988	-44.9705
-71.9013977	-32.7560974
-73.7203217	-39.9051363
-75.297758	-13.894825
-73.4106445	-43.5166885
-68.7135172	-26.0459874
-73.1730652	-39.6331921
-71.0385472	-27.7348827
-70.2106619	-19.5959788
-71.892992	-33.64004
-71.514473	-33.1668698
-71.3631535	-29.3064969
-72.884113	-42.546547
-76.488727	-12.969527
-73.89664	-41.75213
-73.3646008	-38.894192
-76.488173	-13.152679
-73.8429909	-41.46257
-79.683757	-7.174285
-73.7402344	-42.1267474
-73.6478	-42.38098
-73.792162	-42.528988
-73.0989074	-36.6264347
-73.6315727	-43.1202193
-66.9053	-55.0072
-72.9574585	-42.4179145
-73.4220171	-42.5478006
-71.323226	-17.631874
-71.5336	-52.6011
-72.7111888	-45.3953009
-73.5031271	-42.3535967
-72.6737023	-41.9983032
-77.18624	-11.771813
-70.22761	-22.22068
-70.702343	-26.573636
-72.834034	-41.9370388
-70.5943111	-23.3407861
-76.864379	-12.273394
-77.688709	-10.991215
-78.580645	-9.160218
-80.134732	-6.630025
-70.1536703	-21.7577168
-73.3758	-41.4935
-81.35021	-4.185385
-80.799284	-2.116485
-72.0016479	-32.9464538
-72.794916	-33.1139514
-73.8393	-44.7506
-72.178387	-17.003421
-79.947685	-6.853957
-73.1854248	-42.9856297
-71.0938889	-25.3833333
-67.3726	-54.9227
-71.6415024	-30.265591
-73.0968884	-41.589925
-78.907299	-8.475436
-73.3612061	-37.1099554
-73.7091	-44.2571
-70.7947612	-26.9727065
-77.636943	-11.18306
-73.0906677	-43.9386978
-78.754153	-8.747575
-71.951432	-17.090014
-71.590004	-34.0411384
-73.7004089	-38.3308843
-73.7334967	-42.6511161
-70.56629	-22.98338
-71.35	-28.25
-72.558217	-44.3324214
-78.224269	-10.026799
-70.323918	-18.406889
-79.802804	-7.002582
-77.552604	-11.367995
-70.6373905	-25.6455274
-77.135315	-12.001279
-70.1972723	-22.0890598
-72.7624512	-41.2943173
-70.5691767	-23.2070851
-73.5137165	-37.2085421
-71.0807276	-28.5099277
-70.1212478	-21.1122367
-73.7457275	-41.6400784
-79.097548	-8.087482
-73.059082	-43.3890819
-71.3269753	-29.7496286
-70.1671457	-18.5319038
-77.888291	-10.646363
-79.452249	-7.674771
-70.1675963	-21.8947774
-73.9971256	-44.3405818
-71.6934815	-32.9270907
-73.7390971	-42.8508822
-73.2527053	-44.4685429
-74.312787	-15.596535
-71.4466238	-32.3469021
-71.5155029	-32.008076
-79.567387	-7.394825
-80.955317	-6.162708
-78.8323975	-33.6454923
-72.2853184	-41.6691932
-73.2255	-44.2861
-73.4799957	-42.8973147
-71.4509583	-34.1456996
-70.2840686	-22.6847505
-80.269188	-6.567341
-73.6623001	-37.2664029
-75.901576	-14.628733
-73.486948	-38.2464717
-70.6012881	-33.5117726
-77.771713	-10.823118
-76.537863	-12.798119
-77.993888	-10.463477
-71.535244	-29.586485
-72.7192757	-42.908494
-73.6586952	-37.7251079
-73.2540894	-45.2903466
-80.465706	-6.45955
-75.703838	-14.815345
-73.5919189	-43.5644716
-73.8995819	-43.1204446
-78.086657	-10.312536
-80.563448	-2.512328
-73.44	-45.0294444
-70.989922	-17.897718
-80.867193	-5.630622
-71.755349	-17.252096
-72.7616358	-35.9572576
-72.62165	-41.50859
-76.139377	-14.289186
-71.7269897	-29.9858657
-70.3536987	-23.0476804
-76.338897	-13.991163
